# Supplementary material for: Haploinsufficiency of PSMD12 Causes Proteasome Dysfunction and Subclinical Autoinflammation
Source: PubMed Central journal article supplement — Arthritis Rheumatol. 2022 Apr 23;74(6):1083–90. doi: 10.1002/art.42070 (PMC9321778; doi:10.1002/art.42070), 2022-04-23

Figure 2 Elevated inflammation signals in patients PBMCs

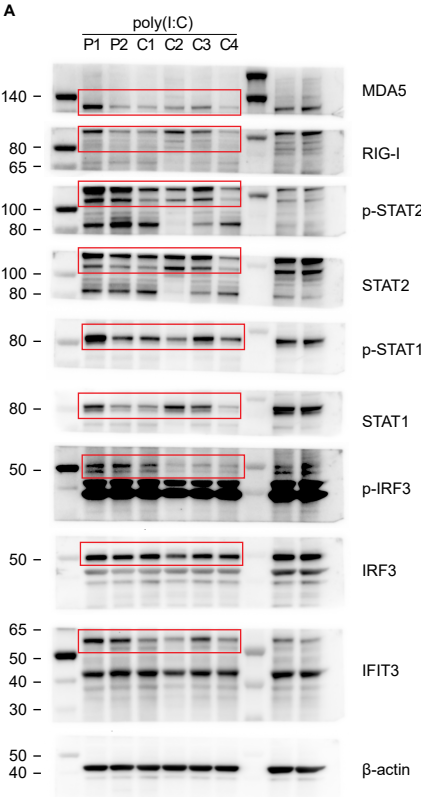



# Figure S1 Defect of proteasome assembly and function in PSMD12 haploinsufficiency

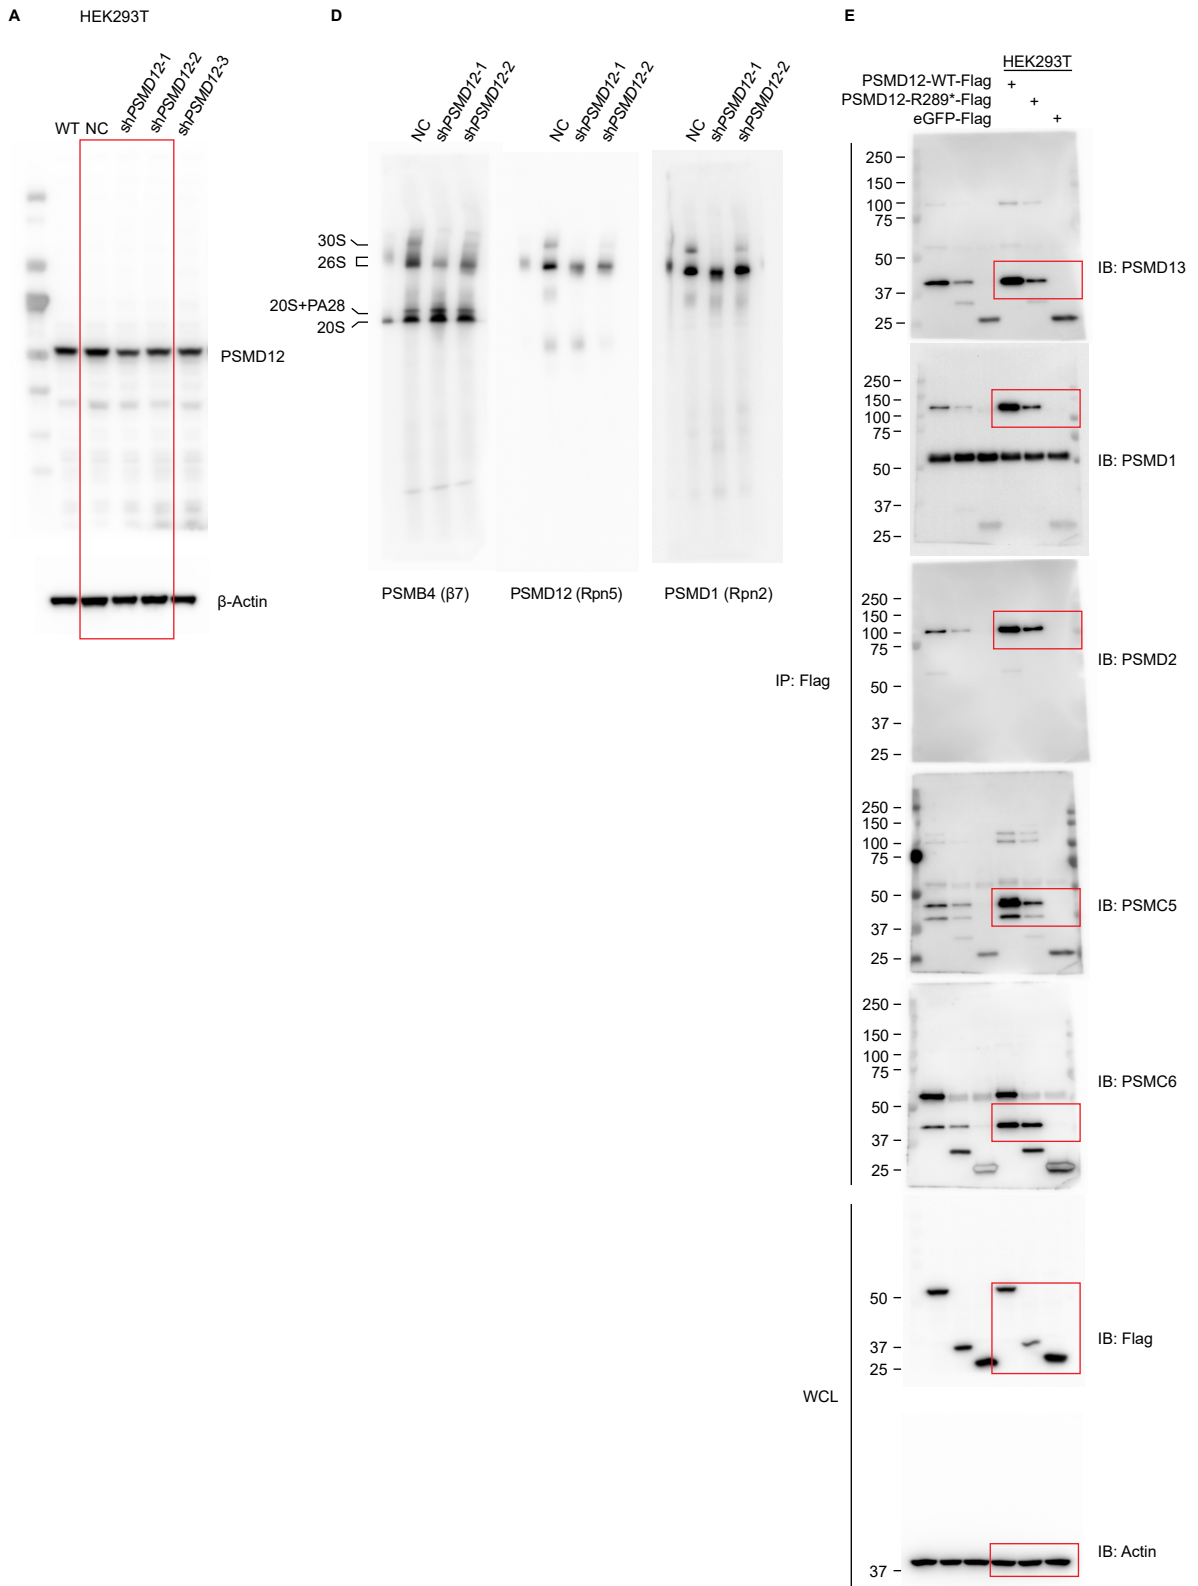

Supplement: ART-74-1083-s004.pdf [file ART-74-1083-s004.pdf]
